# Supplementary material
Source: publisher figshare collection journal article supplement (https://tandf.figshare.com/ndownloader/files/15578711)
Supplement: Supplementary file 1 [file 15578711]

# Supplementary Material

## Influences of different definitions of the winter NAO index on NAO action centers and its relationship with SST

Yujie JING<sup>a,b</sup>, Yangchun LI<sup>b,c,d</sup>, Yongfu XU<sup>b,c,d</sup> and Guangzhou FAN<sup>a</sup>

<sup>a</sup>School of Atmospheric Sciences, Chengdu University of Information Technology, Chengdu 610225, China; <sup>b</sup>State Key Laboratory of Atmospheric Boundary Layer Physics and Atmospheric Chemistry, Institute of Atmospheric Physics, Chinese Academy of Sciences, Beijing 100029, China; <sup>c</sup>Laboratory for Regional Oceanography and Numerical Modeling, Qingdao National Laboratory for Marine Science and Technology, Qingdao 266237, China; <sup>d</sup>Department of Atmospheric Chemistry and Environmental Sciences, College of Earth Science, University of Chinese Academy of Sciences, Beijing 100049, China

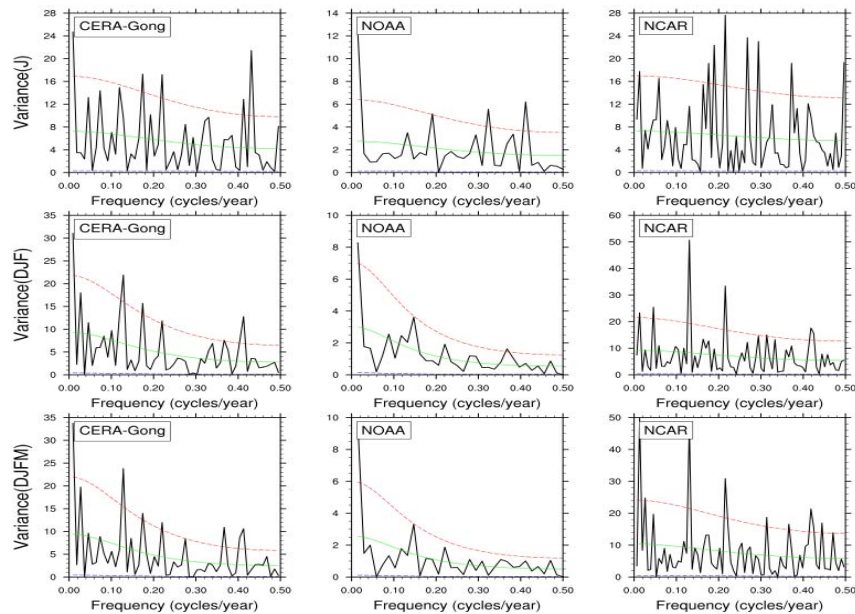

**Figure S1.** Power spectrum of three sets of observation-based NAO indexes. The time

ranges for  $\text{NAO}_{\text{Gong-obs}}$ ,  $\text{NAO}_{\text{NOAA-obs}}$ , and  $\text{NAO}_{\text{NCAR-obs}}$  are 1901–2010, 1950–2017, and 1865–2017, respectively.
